# Supplementary material for: New insights into the mechanism of substrates trafficking in Glyoxylate/Hydroxypyruvate reductases
Source: PubMed Central journal article supplement (PMC4749974; doi:10.1038/srep20629), 2016-02-11

## **New insights into the mechanism of substrates trafficking in Glyoxylate/Hydroxypyruvate reductases.**

Louise Lassalle<sup>123</sup>, Sylvain Engilberge<sup>123</sup>, Dominique Madern<sup>213</sup>, Pierre Vauclare<sup>213</sup>, Bruno Franzetti<sup>213</sup>, Eric Girard<sup>312</sup>

1 Univ. Grenoble Alpes, IBS, F-38044 Grenoble, France

2 CNRS, IBS, F-38044 Grenoble, France

3 CEA, IBS, F-38044 Grenoble, France

### **ONLINE-ONLY MATERIAL**

In this section we have included supporting information concerning one figure.

### Supplementary Figure S1:

For all panels, relative specific activity as a function of temperature is represented for *P. furiosus* GRHPR (circle, green), *P. horikoshii* GRHPR (square, red) and *P. yayanosii* GRHPR (triangle, blue) for (A) Hydroxypyruvate reductase (HPR) activity with NADH, (B) Hydroxypyruvate reductase activity with NADPH, (C) Glyoxylate reductase (GR) activity with NADH and (D) Glyoxylate reductase activity with NADPH. Standard deviation bars are not visible when they are smaller than the font size used for the data point. Assays were performed as described under “Methods”.

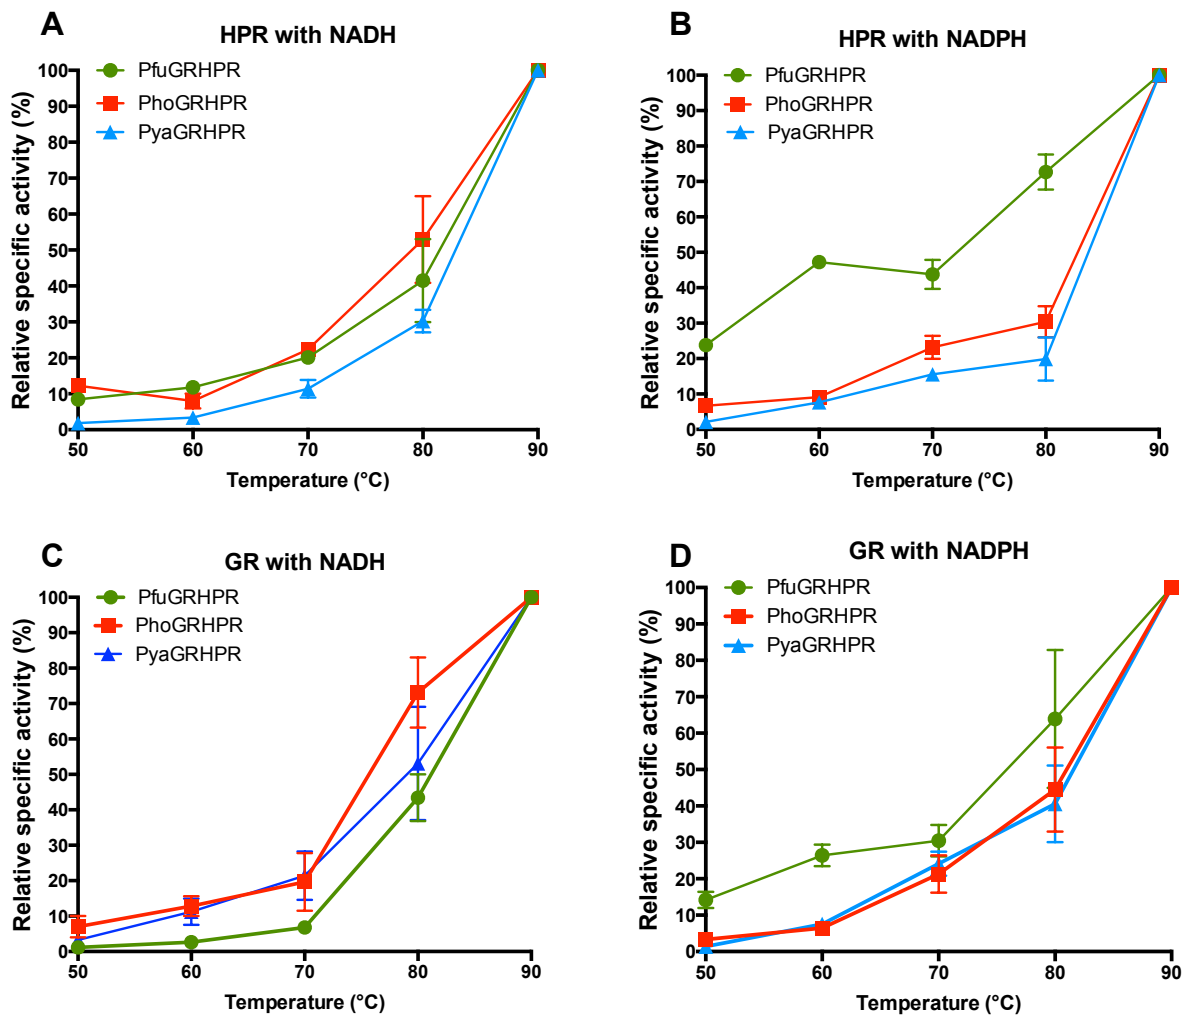

Supplement: srep20629-s1.pdf [file srep20629-s1.pdf]
